# Supplementary material
Source: PubMed Central journal article supplement (PMC3255989)
Supplement: supp_JCO.2011.35.4928_MET_Suppl.pdf [file supp_JCO.2011.35.4928_MET_Suppl.pdf]

## Supplemental Information

**Supplemental Table 1.** Clinical Characteristics of the *MET*-amplified subgroup (Case No. 1-10) and four patients with *MET*-amplified tumors who received crizotinib (Cr1-4).

| Case No. | Age, Sex | Tumor        | Stage           | Histology (G:CN)    | Treatment                         | Outcome                      | Pertinent History          | GERD/PPI | BE | HP  | Smoking | Drinking |
|----------|----------|--------------|-----------------|---------------------|-----------------------------------|------------------------------|----------------------------|----------|----|-----|---------|----------|
| 1        | 70, F    | E, mid       | IIIA<br>(pT3N1) | AdCa<br>(>10)       | CXRT (Carb/FU)                    | DOD<br>452dpd                | HTN,RA,<br>OA,DP           | ++       | -  | N/A | 40py    | <1/day   |
| 2        | 68, M    | E,<br>distal | IIIA<br>(cT3N1) | AdCa<br>(>2.5)      | CXRT (Cis/FU)                     | DOD<br>188dpd                | CAD,UC,<br>PSO             | ++       | +  | N/A | 60py    | none     |
| 3*       | 65, M    | E,<br>distal | IV<br>(M1)      | AdCa<br>(>5)        | Palliative                        | DOD<br>29dpd                 | HTN,DM,<br>Gout            | ++       | +  | N/A | 40py    | heavy    |
| 4        | 44, M    | GEJ          | IV<br>(M1)      | AdCa<br>(>2.5)      | FU                                | DOD<br>215 dpd               | PCKD,WT,<br>OC,Gout,<br>AR | ++       | -  | -   | Never   | <1/day   |
| 5        | 33, M    | GEJ          | IV<br>(M1)      | AdCa<br>(3.5)       | Irinotecan                        | DOD<br>239 dpd               |                            | ++       | -  | -   | 15py    | 3/day    |
| 6        | 83, F    | GEJ          | I<br>(pT1)      | AdCa<br>(4.2)       | N/A                               | Alive<br>473 dpd,<br>HGDx3   | IDDM,<br>HTN,NP            | ++       | +  | -   | Never   | <1/day   |
| 7        | 71, M    | G            | IV<br>(M1)      | AdCa<br>(4.7)       | Palliative                        | DOD<br>47 dpd                | UTI,CC                     | ++       | -  | -   | 55py    | <1/day   |
| 8        | 61, M    | G            | IV<br>(M1)      | MAC<br>(5.1)        | Irinotecan/Cisplatin              | DOD<br>123 dpd               | HTN,HepA<br>,PE,BPH        | ++       | -  | -   | No      | 2/day    |
| 9        | 72, M    | G            | IV<br>(M1)      | DTAC<br>(3.2)       | Irinotecan/Cisplatin              | DOD<br>244 dpd               | HTN,AEE                    | ++       | -  | N/A | No      | <1/day   |
| 10       | 59, M    | G            | IV<br>(M1)      | AdCa<br>(>10)       | Irinotecan/Cisplatin              | Lost to<br>F/U at<br>142 dpd | HTN,OA                     | -/-      | -  | N/A | No      | <1/day   |
| Cr1      | 62, M    | G            | IV<br>(M1)      | AdCa<br>(3.3 focal) | Capecitabine/Cisplatin            | DOD                          | GU+SGE                     | -/-      | -  | -   | N/A     | N/A      |
| Cr2      | 51, M    | G            | IV<br>(M1)      | AdCa<br>(>5)        | Capecitabine/Cisplatin/Paclitaxel | DOD                          | N/A                        | -/-      | -  | -   | 12.5py  | +        |
| Cr3      | 57, M    | GEJ          | IIIA<br>(pT3N1) | AdCa<br>(>5)        | Neoadj. ECF                       | PD                           | PE                         | ++       | +  | N/A | 37py    | none     |
| Cr4      | 52, M    | GEJ          | IIIA<br>(pT3N1) | AdCa<br>(>5)        | CXRT<br>+Crizotinib               | DOD<br>492 dpd               | DM2,<br>TrigN, PE          | ++       | +  | +   | 30py    | 2/day    |

**Abbreviations:** +, positive/present; -, negative/absent; \*, patient with low-level EGFR amplification (G:CN ~2.5); AdCa, Adenocarcinoma; AEE, arterial embolus with embolectomy; AR, allergic rhinitis; BE, Barrett's esophagus/intestinal metaplasia; BPH, benign prostatic hypertrophy; CAD, coronary artery disease; Carb, Carboplatin; CC, chronic constipation; CXRT, pre-operative chemo-radiation; DM2, diabetes mellitus type 2; DOD, died of disease; DP, depression; dpd, days post diagnosis; DTAC, diffuse-type adenocarcinoma; E, esophageal; ECF, epirubicin, cisplatin, 5-fluorouracil; F, female; FU, 5-fluorouracil; (G:CN), gene-to-copy number ratio with copies too numerous to count assigned >10; GEJ, gastroesophageal junction; GERD, gastroesophageal reflux disease; GU, gastric ulcer; HepA, hepatitis A; HGDx3, high-grade dysplasia on 3 subsequent biopsies; HP, *Helicobacter pylori*; HTN, hypertension; IDDM, insulin dependent diabetes mellitus; M, male; MAC, mucinous adenocarcinoma; N/A, not applicable/available; NP, neuropathy; OA, osteoarthritis; OC, osteochondroma, PCKD, polycystic kidney disease; PD, progressive disease; PE, pulmonary embolism; PPI, proton pump inhibitor; PSO, psoriasis; py, pack-years; RA, rheumatoid arthritis; SGE, subtotal gastrectomy; TrigN, trigeminal neuralgia; tu, tumor; UC, ulcerative colitis; UTI, urinary tract infections; WT, Wilms tumor.

**Supplemental Table 2.** Clinicopathologic Characteristics of Patients with Gastro Esophageal Cancer by Location.

| Characteristics               | Esophageal<br>(E; N=222) |     | Junctional<br>(J; N=97) |    | Gastric<br>(G; N=170) |            | <i>P</i> |         |        |
|-------------------------------|--------------------------|-----|-------------------------|----|-----------------------|------------|----------|---------|--------|
|                               | No.                      | %   | No.                     | %  | No.                   | %          | E v. G   | J v. G  | E v. J |
| <b>Age, years</b>             |                          |     |                         |    |                       |            | 0.87     | 0.49    | 0.32   |
| Median                        | 64                       |     | 62                      |    | 66                    |            |          |         |        |
| Range                         | 36-89                    |     | 22-93                   |    | 30-96                 |            |          |         |        |
| <b>Sex</b>                    |                          |     |                         |    |                       |            | <0.0001  | <0.0001 | 0.42   |
| Male                          | 181                      | 82  | 83                      | 86 | 103                   | 61         |          |         |        |
| Female                        | 41                       | 18  | 14                      | 14 | 67                    | 39         |          |         |        |
| <b>Pathology</b>              |                          |     |                         |    |                       |            | <0.0001  | <0.0001 | 0.004  |
| Adeno                         |                          |     |                         |    |                       |            |          |         |        |
| Intestinal                    | 190                      | 86  | 88                      | 91 | 92                    | 54         |          |         |        |
| Diffuse<br>(Signet-ring cell) | 6<br>(6)                 | 3   | 8                       | 8  | 65<br>(37)            | 39<br>(22) |          |         |        |
| Mixed                         |                          |     |                         |    | 4                     | 2          |          |         |        |
| Mucinous                      | 1                        | 0.5 |                         |    | 4                     | 2          |          |         |        |
| Medullary                     |                          |     | 1                       | 1  | 1                     | 1          |          |         |        |
| Adenosquamous                 | 1                        | 0.5 |                         |    |                       |            |          |         |        |
| Squamous                      | 21                       | 9   |                         |    |                       |            |          |         |        |
| Neuroendocrine                | 3                        | 1   |                         |    | 4                     | 2          |          |         |        |
| <b>Differentiation</b>        |                          |     |                         |    |                       |            | <0.0001  | 0.008   | 0.36   |
| Well                          | 12                       | 5   | 5                       | 5  | 9                     | 5.4        |          |         |        |
| Moderate                      | 123                      | 56  | 44                      | 45 | 43                    | 25         |          |         |        |
| Poor                          | 84                       | 38  | 47                      | 49 | 117                   | 69         |          |         |        |
| Undifferentiated              | 3                        | 1   | 1                       | 1  | 1                     | 0.6        |          |         |        |
| <b>Stage*</b>                 |                          |     |                         |    |                       |            | <0.0001  | 0.004   | 0.17   |
| 0                             | 28                       | 13  | 4                       | 4  | 4                     | 2          |          |         |        |
| I                             | 26                       | 12  | 12                      | 12 | 31                    | 18         |          |         |        |
| II                            | 41                       | 18  | 23                      | 24 | 21                    | 12         |          |         |        |
| III                           | 58                       | 26  | 30                      | 31 | 33                    | 20         |          |         |        |
| IV                            | 69                       | 31  | 28                      | 29 | 81                    | 48         |          |         |        |

\*Staging including sub-categories for esophageal and gastric lesions is provided in Fig. 2.

**Note:** Comparison of clinicopathologic characteristics demonstrates that esophageal (E) and junctional (J) carcinomas are more similar to each other rather than to gastric carcinoma (G). *P*-values derived from Fisher's exact test for dichotomous variables, or  $\chi^2$  for pathology, differentiation and stage comparisons (taking all categories into account).

**Supplemental Table 3.** Amplification frequency by anatomic site

|                         | <i>MET</i> |     | <i>EGFR</i> |     | <i>HER2</i> |      | <i>MET+EGFR+HER2</i> |    | TN  |    |
|-------------------------|------------|-----|-------------|-----|-------------|------|----------------------|----|-----|----|
|                         | No.        | %   | No.         | %   | No.         | %    | No.                  | %  | No. | %  |
| Esophageal (E)<br>N=222 | 3          | 1.3 | 18          | 8   | 30          | 13.5 | 51                   | 23 | 171 | 77 |
| Junctional (J)<br>N=97  | 3          | 3   | 1           | 1   | 10          | 10   | 14                   | 14 | 83  | 85 |
| E + J<br>N=319          | 6          | 1.9 | 19          | 6   | 40          | 12.5 | 65                   | 20 | 254 | 80 |
| Gastric (G)<br>N=170    | 4          | 2.3 | 4           | 2.4 | 5           | 2.9  | 13                   | 8  | 157 | 92 |
| E + J + G<br>N=489      | 10         | 2   | 23          | 4.7 | 45          | 9.2  | 78                   | 16 | 411 | 84 |

**Note:** We separated esophageal (E, prior Siewert type I<sup>1,2</sup>) from junctional (J, Type II) from gastric (G, Type III) carcinomas to allow comparison with prior datasets. Although prior guidelines subsumed J+G as ‘gastric’<sup>3</sup>, here we subsumed E+J as ‘esophageal’ according to current recommendations<sup>4,5</sup>.

**Abbreviations:** TN, triple negative (no *MET/EGFR/HER2* amplification).

### Supplemental References

1. Siewert JR, Stein HJ: Adenocarcinoma of the gastroesophageal junction: classification, pathology and extent of resection. *Dis Esophagus* 9:173-82, 1996
2. Siewert JR, Stein HJ: Classification of adenocarcinoma of the oesophagogastric junction. *Br J Surg* 85:1457-9, 1998
3. American Joint Committee on Cancer. Digestive system., *AJCC Cancer Staging Manual* 6th edn. New York, Springer, 2002, pp 91-103
4. American Joint Committee on Cancer, Chapter 10. Esophagus and esophagogastric junction, *AJCC Cancer Staging Manual* 7th edn. New York, Springer, 2009, pp 129-144
5. Sobin LH, Compton CC: TNM seventh edition: What's new, what's changed: communication from the International Union Against Cancer and the American Joint Committee on Cancer. *Cancer* 116:5336-9

**Supplemental Table 4.** Statistical Comparison of Survival Times between Stage III vs. Stage IV Tumors by Location and Genotype.

|                                               | <i>MET</i>   |              |          | <i>EGFR</i>  |              |          | <i>HER2</i>  |               |          | TN              |                 |          |
|-----------------------------------------------|--------------|--------------|----------|--------------|--------------|----------|--------------|---------------|----------|-----------------|-----------------|----------|
|                                               | III          | IV           | <i>P</i> | III          | IV           | <i>P</i> | III          | IV            | <i>P</i> | III             | IV              | <i>P</i> |
| E, MS (in mo.)<br>N=127(38); n(cens.)         | 10.6<br>2(0) | 0.96<br>1(0) | 0.157    | 16.7<br>6(2) | 11.7<br>6(0) | 0.46     | NMR<br>3(2)  | 16.9<br>8(5)  | 0.518    | 25.9<br>47(20)  | 11.9<br>54(9)   | <0.0001  |
| J, MS (in mo.)<br>N=58(19); n(cens.)          | N/A<br>2(0)  | 7.6<br>2(0)  | N/A      | 14.2<br>1(0) | 8.4<br>1(0)  | 0.32     | 33.4<br>2(1) | 6.5<br>3(1)   | 0.117    | 27.9<br>27(13)  | 9.5<br>22(4)    | 0.04     |
| E + J, MS (in mo.)<br>N=185(57); n(cens.)     | 10.6<br>2(0) | 7.2<br>3(0)  | 0.455    | 14.2<br>7(2) | 11.3<br>7(0) | 0.39     | NMR<br>5(3)  | 14.0<br>11(6) | 0.28     | 25.9<br>74(33)  | 11.6<br>76(13)  | <0.0001  |
| G, MS (in mo.)<br>N=114(38); n(cens.)         | N/A<br>4(1)  | 6.2<br>4(1)  | N/A      | N/A<br>3(0)  | 2.3<br>3(0)  | N/A      | 24.1<br>1(0) | 4.2<br>3(0)   | 0.92     | 29.5<br>32(19)  | 11.8<br>71(18)  | 0.0005   |
| E + J + G, MS (in mo.)<br>N=299(95); n(cens.) | 10.7<br>2(0) | 7.2<br>7(1)  | 0.305    | 14.2<br>7(2) | 8.6<br>10(0) | 0.17     | 24.1<br>6(3) | 11.2<br>14(6) | 0.27     | 25.9<br>106(52) | 11.8<br>147(31) | <0.0001  |

**Note:** Although numbers per bin are relatively small, we tallied survival times by location, genotype and stage for comparison between locally advanced and metastatic tumors. Detailed graphs, including 95% confidence intervals and comparisons of *MET*, *EGFR*, and *HER2* vs. non-amplified group (TN) by location are provided in [Supplemental Figure 1, available online](#). *P*-values, log-rank test.

**Abbreviations:** cens., censored; E, esophagus; G, gastric; J, junctional; mo., months; MS, median survival, N, total number by site; n, total number in category; N/A, not applicable/not available; NMR, no median reached

**Supplemental Figure 1. Overall Survival by Location and Genotype**

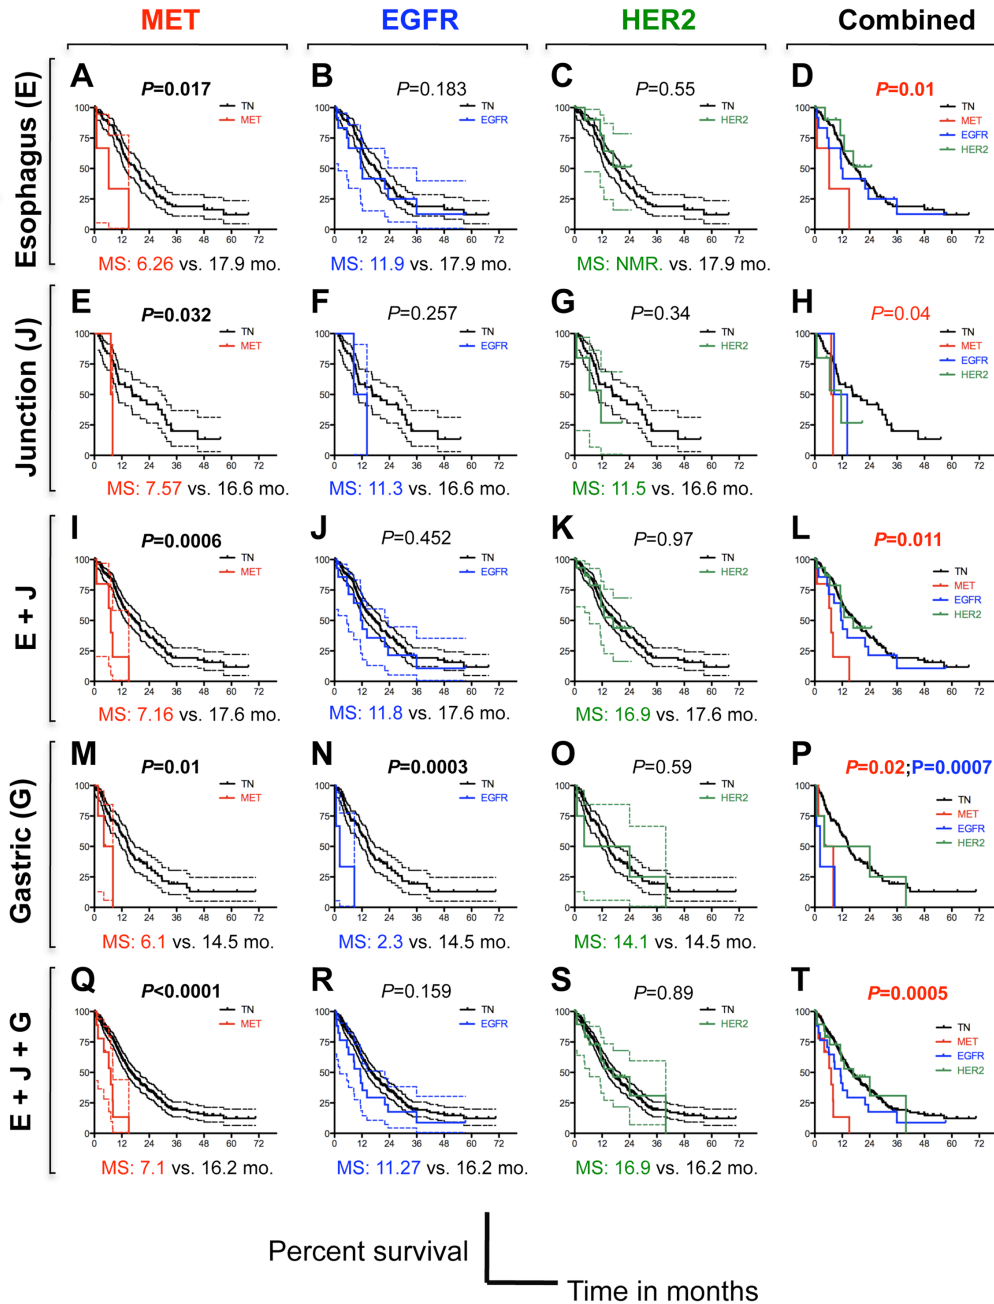

Kaplan-Meier graphs for locally advanced and metastatic tumors (including 95% confidence intervals) show comparisons of median survival (MS) vs. the triple-negative group (TN; no *MET/EGFR/HER2* amplification) for each genetic subset and anatomic location. Median survival for each trace is provided below the graphs and corresponding *P*-values are derived from log-rank test and printed in bold, when significant. *P*-values in the combined graphs in the right column (D, H, L, P, and T) are derived from comparison of the genetic subset (as indicated by color) versus the combined median survival of the remaining 3 subgroups (e.g. *MET* vs. *EGFR/HER2/TN*). The resulting *P*-values are somewhat lower but illustrate that median survival in *MET*-amplified subsets is significantly shorter even when other amplified subsets (i.e. *EGFR* and *HER2*) are included. NMR, no median reached.
